# Supplementary material for: The RelB-BLNK Axis Determines Cellular Response to a Novel Redox-Active Agent Betamethasone during Radiation Therapy in Prostate Cancer
Source: MDPI journal article supplement (doi:10.3390/ijms23126409), 2022-06-08
Supplement: s1 [file s1]

## **Supplementary Figures**

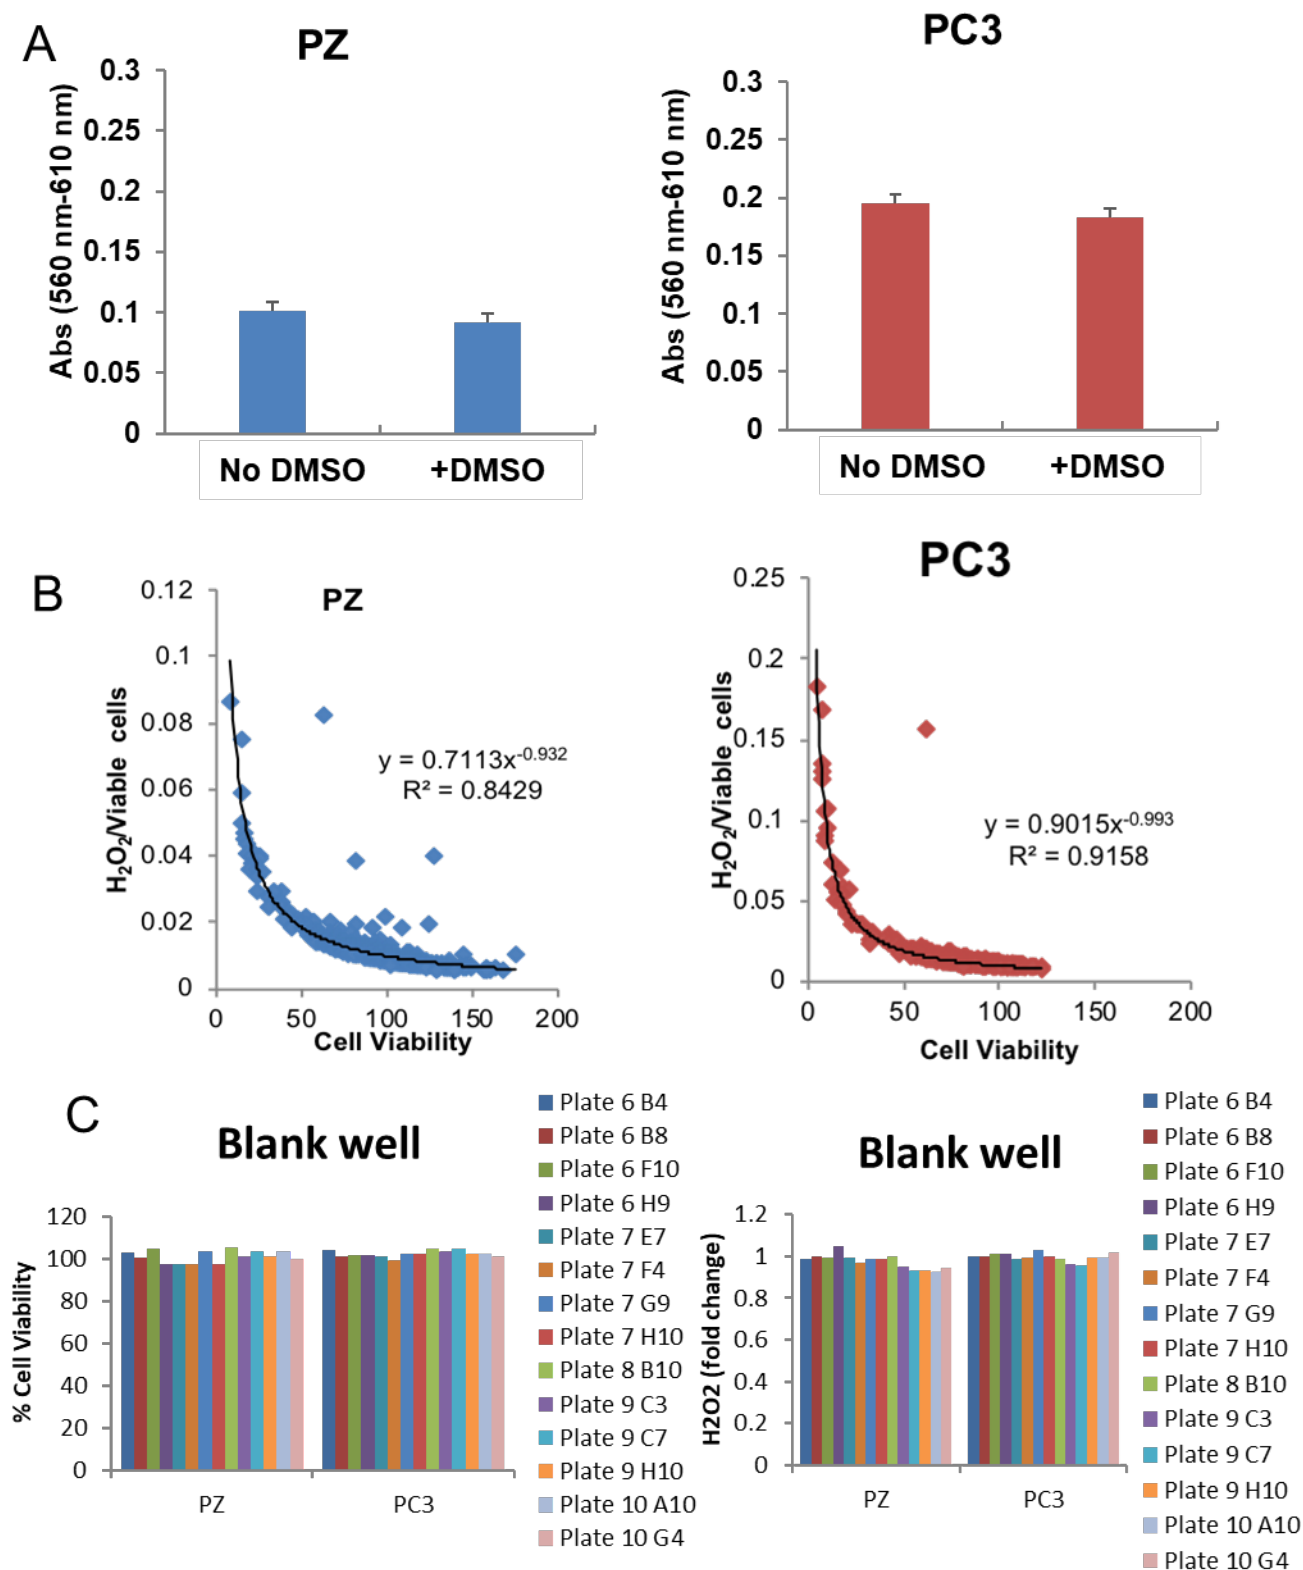

**Supplementary Figure S1.** High level of H<sub>2</sub>O<sub>2</sub> production correlated with less cell viability in both PC3 and PZ cells. (A) Effect of DMSO on cell viability. MTT assay of PC3 cells and PZ cells after treatment with DMSO

for 24 hours. (B) H<sub>2</sub>O<sub>2</sub> production per viable cell based on Amplex red assay after treatment of PC3 cells and PZ cells with FDA drugs.

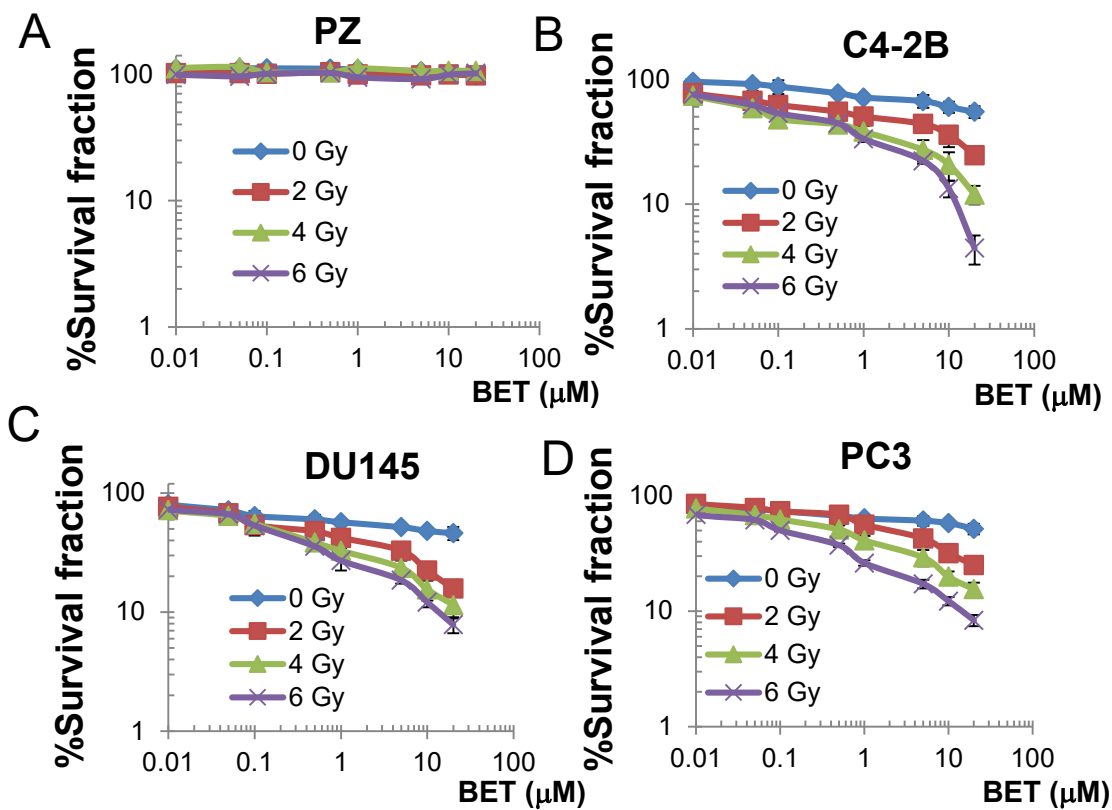

**Supplementary Figure S2. Effect of BET as radiosensitizer on prostate cancer cells.** Cells were treated with vary doses of BET followed by vary dose of radiation. Survival fraction calculation based on colony formation are performed after 10-12 days.

### A. Week 1

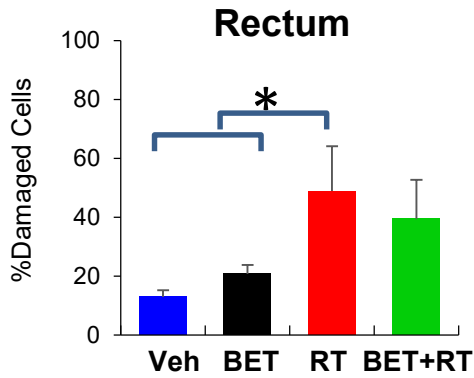

### B. Week 1

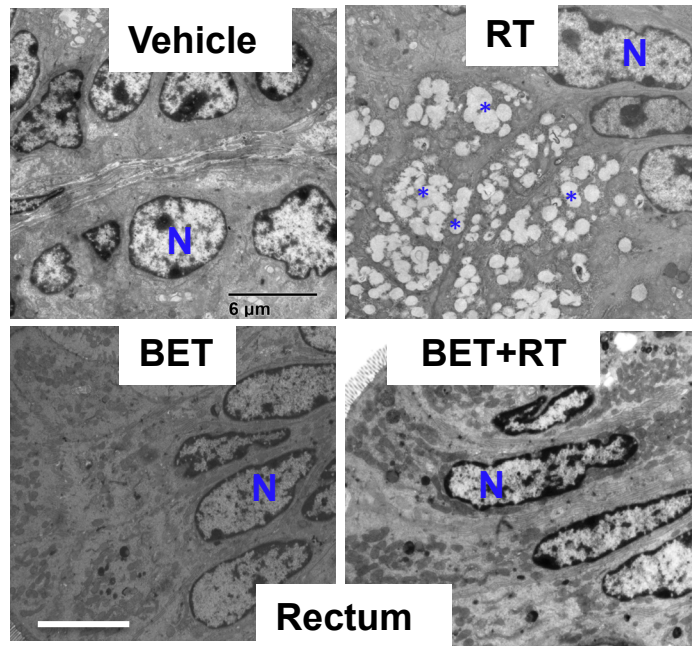

### C. Week 4

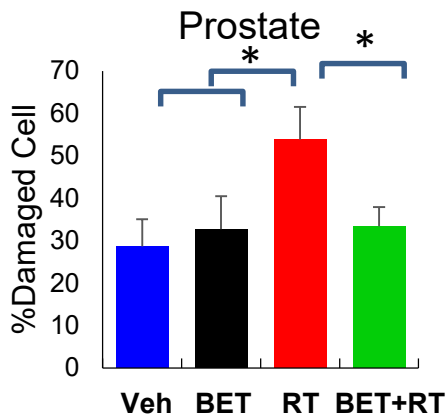

### D. Week 4

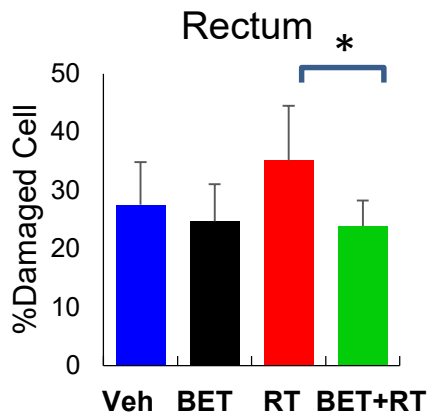

### E. Week 4

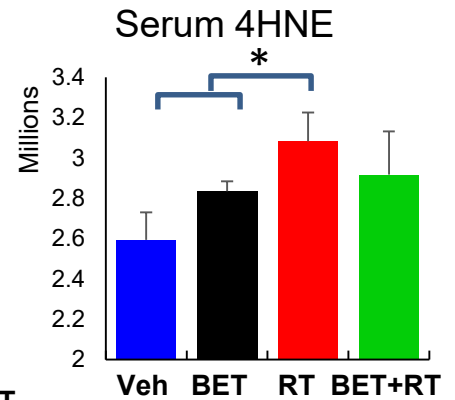

**Supplementary Figure S3. Effect of BET on normal tissues.** BET mitigated prostate damage and rectum damage, which were associated with a decrease in 4HNE protein adduct and PSA level in the serum after treatment with RT (10 Gy) for 4 weeks. (A) % of rectum damage 1 w week after RT+ BET treatment. (B) Representative photographs of damaged rectum. N=Nucleus. Star=Damaged mitochondria as indicated by loss of cristae and vacuolization of mitochondria. Bar = 6  $\mu$ m. (C) % of prostate and (D) rectum damage after treatment for 4 weeks. (E) Serum 4HNE (RU= Relative Arbitrary Unit) after 4 weeks of treatment. \*p-value < 0.05.

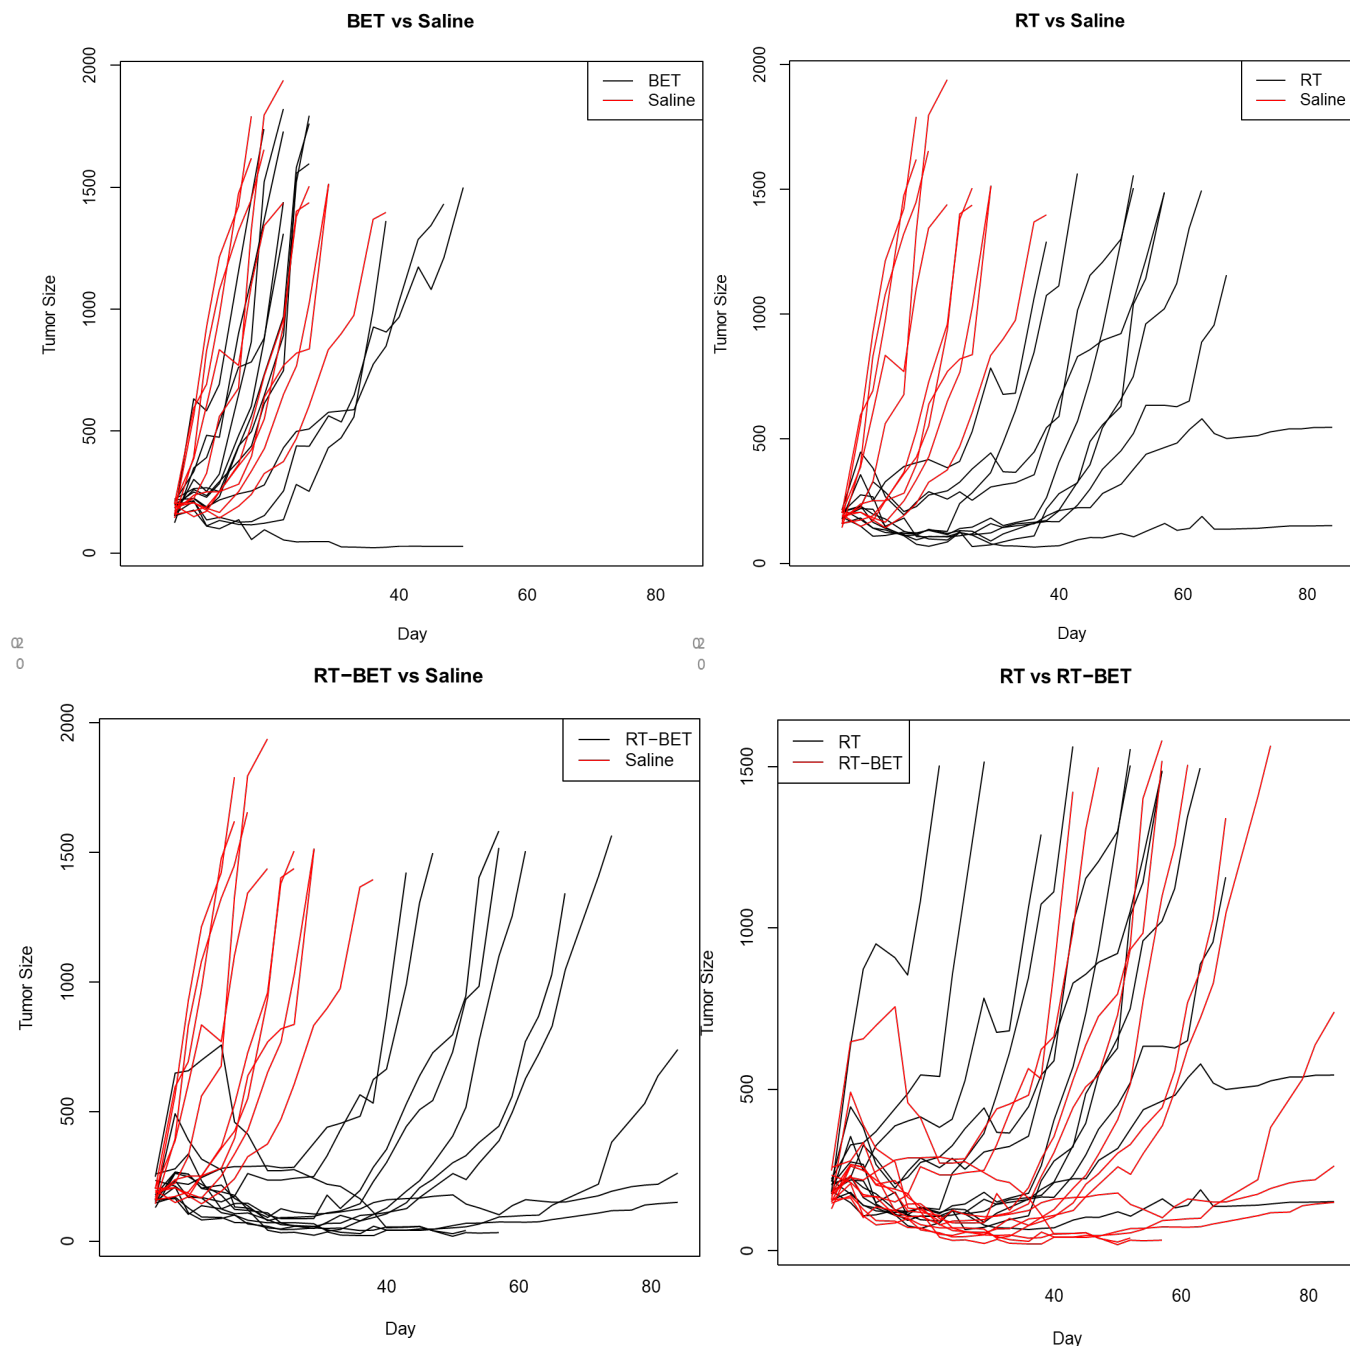

**Supplementary Figure S4. Effect of BET on tumor growth.** BET did not interfere with radiation therapy in tumor bearing mice. Mice were s.c. xenografted with PC3 cells. Once tumor reach ~250 mm<sup>3</sup>, mice were treated with BET (20 mg/kg) and RT (2 Gy $\times$ 5). Tumor size of individual mouse in each group are reported.

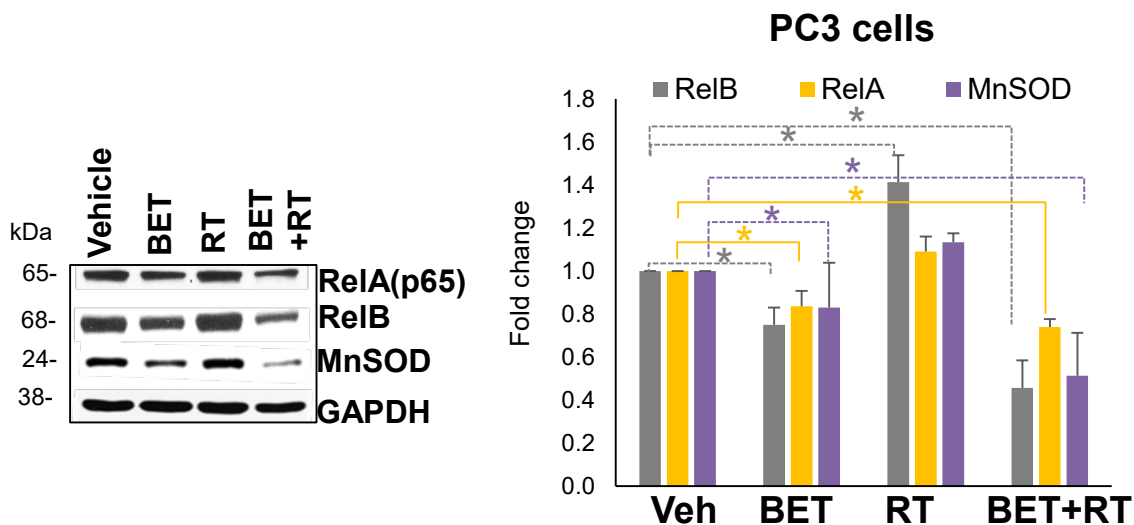

**Supplementary Figure S5. BET suppress RelB expression and RelB-associated proteins.** Representative western blots and quantitative analysis of protein expression normalize with GAPDH in PC3 cells. N=3. \*p-value < 0.05. Three separate experiments were tested.

# Pathway analysis

## PZ Control vs PC3 Control

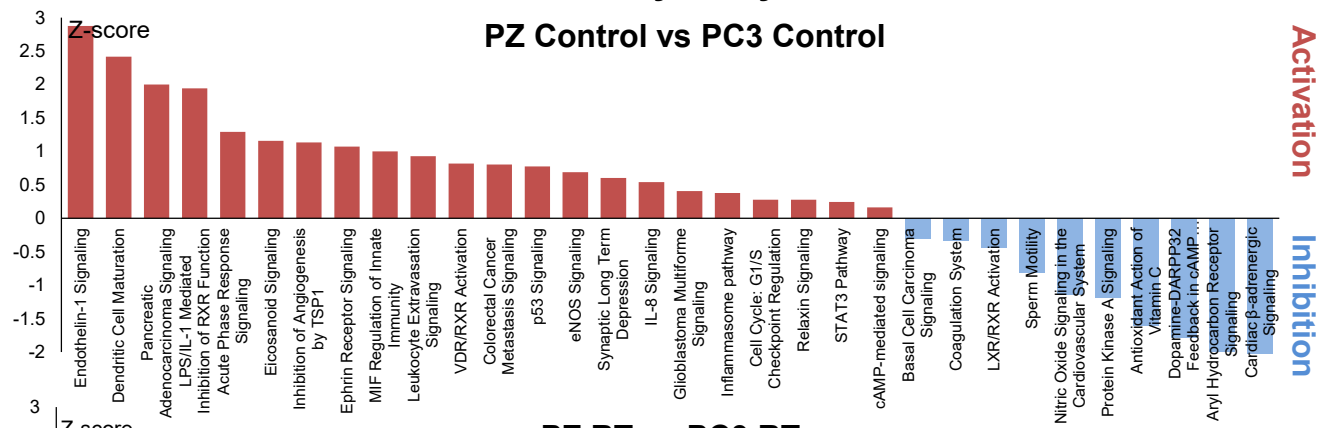

## PZ RT vs PC3 RT

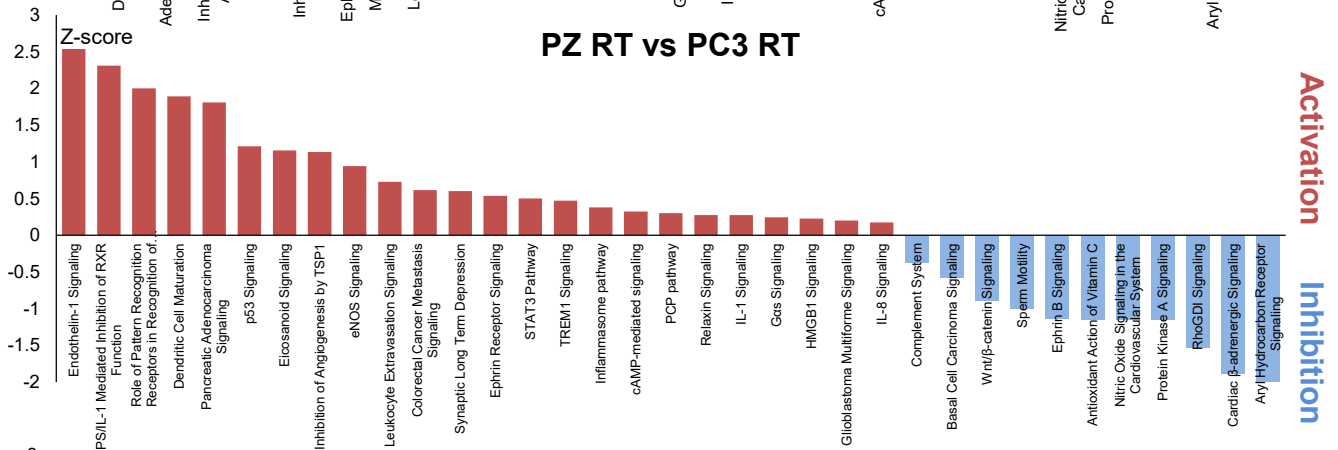

## PZ BET vs PC3 BET

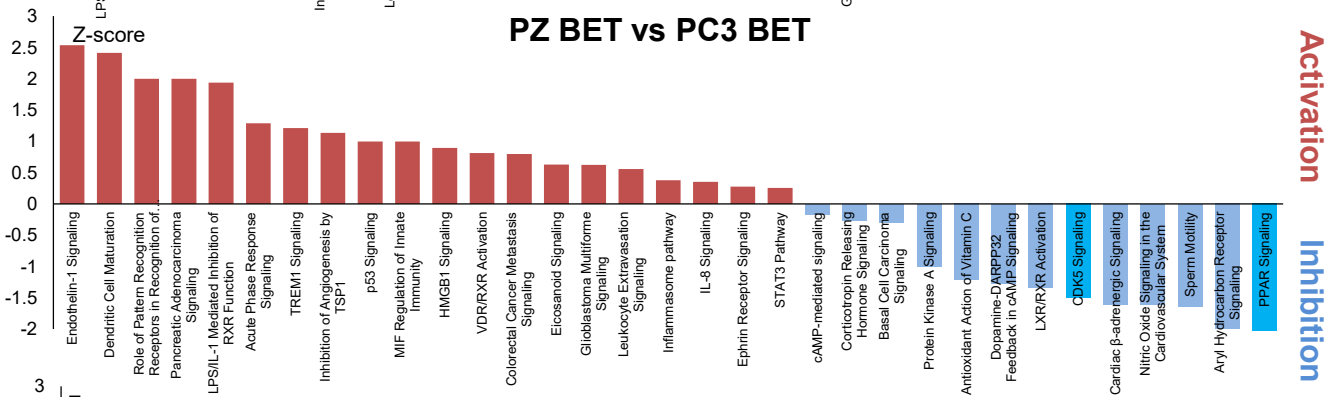

## PZ RT+BET vs PC3 RT+BET

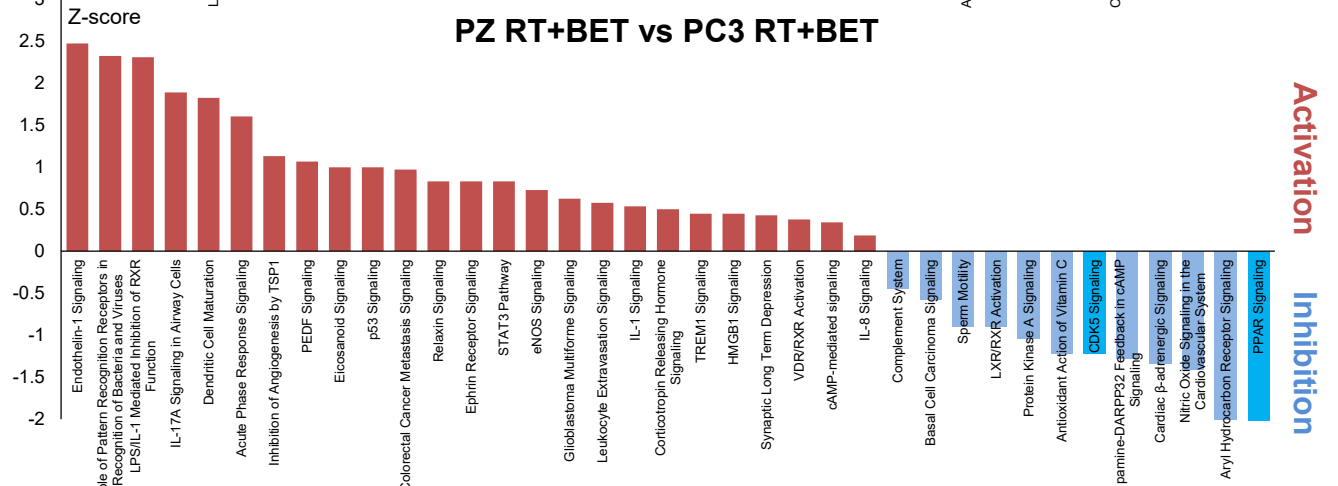

**Supplementary Figure S6. Identification of key regulators with BET + RT treatment.** Pathways that were differentially modulated by radiation in the presence of BET (up-regulated [Red] and inhibited [Blue] in PZ cells compared to PC3 cells for each treatment). Data obtained from whole transcriptome RNA Seq analyses of PZ and PC3. The rank order was determined by the indicated IPA z-score (y-axis) which are the predictions of the activation/inhibition states of canonical pathways.

## A. PZ

### 1. w/out primary antibody

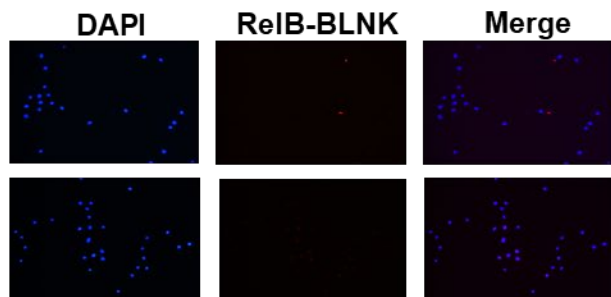

### 3. anti-BLNK Goat polyclonal.

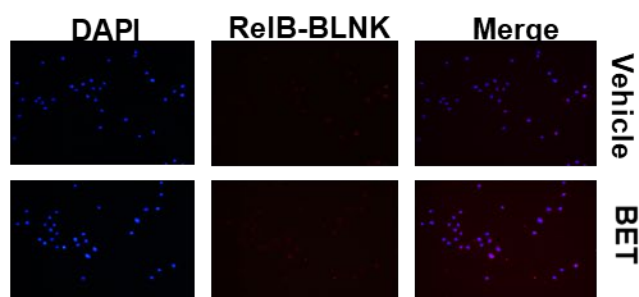

### 2. anti-ReIB Rabbit polyclonal.

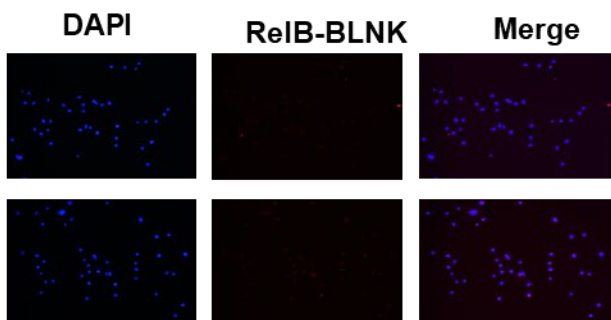

### 4. anti-ReIB (R) + BLNK (G).

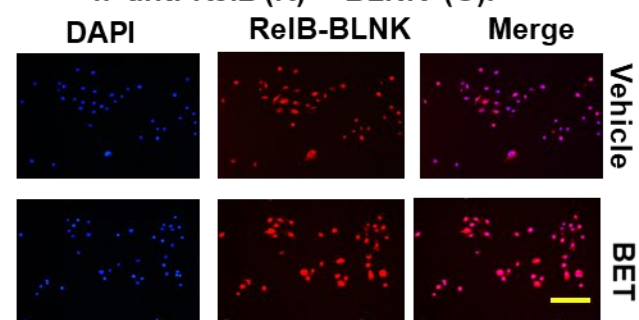

## B. PC3

### 1. w/out primary antibody

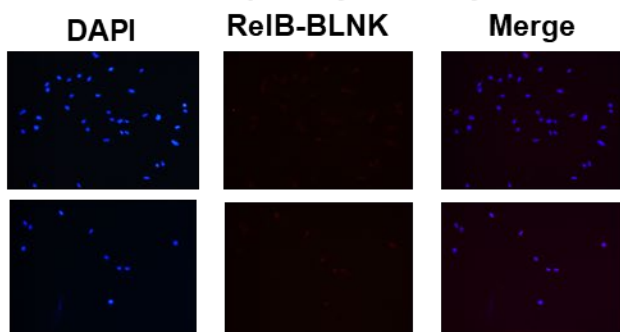

### 3. anti-BLNK Goat polyclonal.

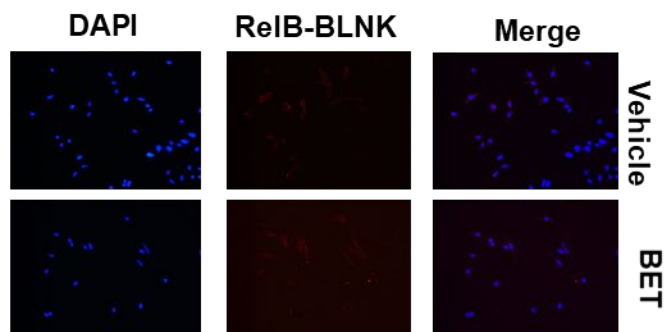

### 2. anti-ReIB Rabbit polyclonal.

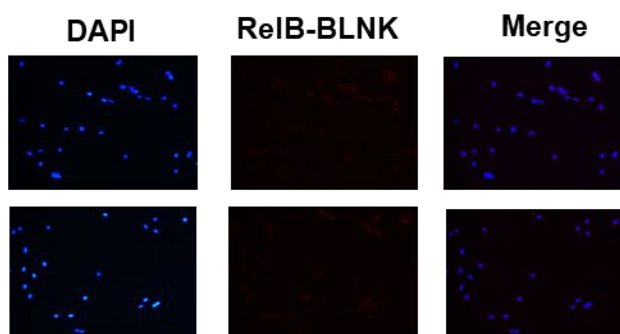

### 4. anti-ReIB (R) + BLNK (G).

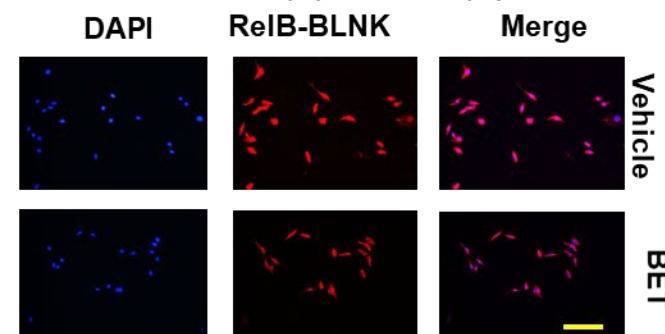

**Supplementary Figure S7.** PLA ligation assays of (A) PZ cells and (B) PC3 cells after BET treatment for 24 hours. R = Anti-rabbit antibody. G= Anti-goat antibody. Bar = 50  $\mu$ m.



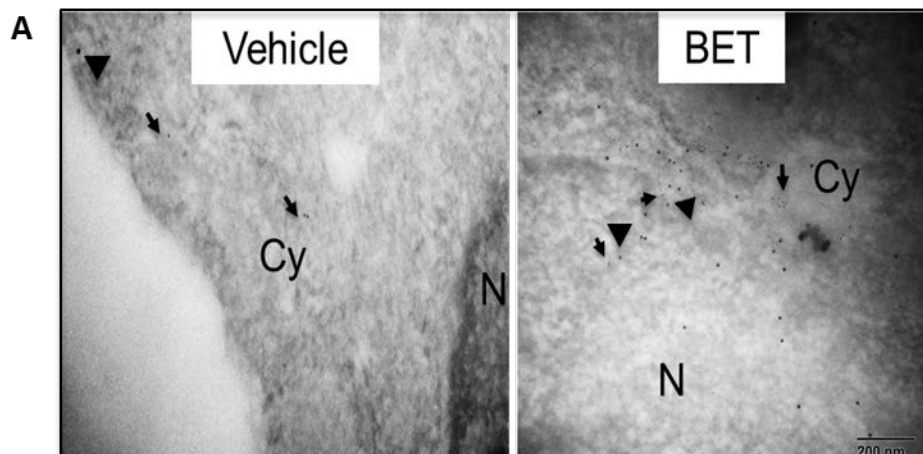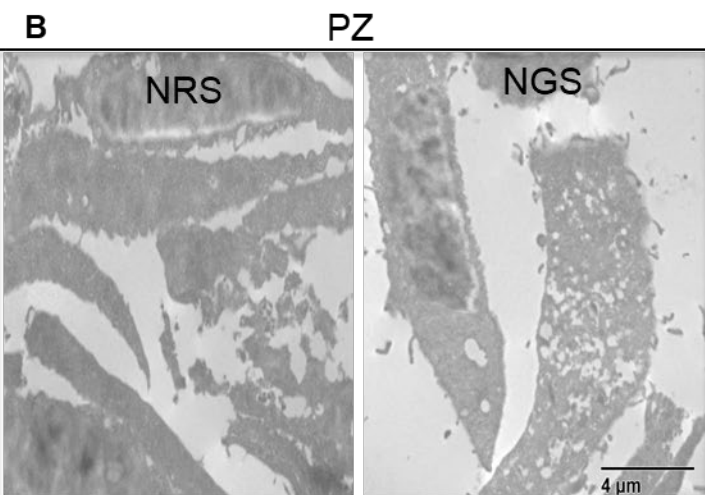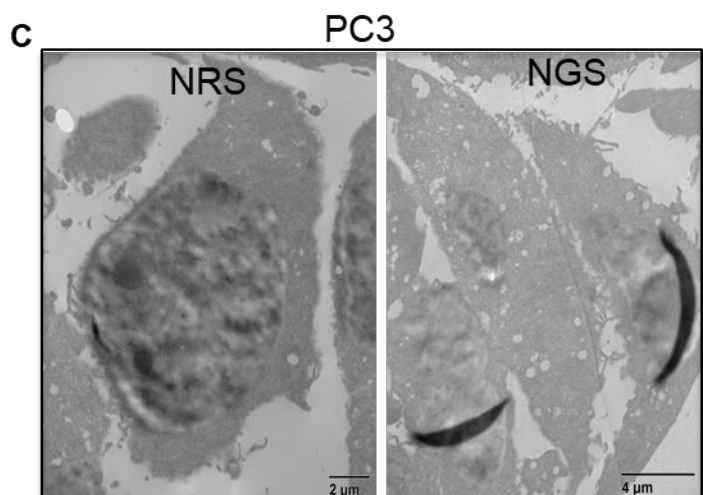

**Supplementary Figure S8** Representative electron micrograph. (A) Photograph displays the localization of RelB (6 nm gold beads, arrows) and BLNK (10 nm gold beads, arrow heads) in nucleus and cytoplasm of PZ cells (15000X). RelB and BLNK were found more in the nucleus after BET treatment but were not detectable in the nucleus of vehicle-treated group. (B) PZ cells and (C) PC3 cells stained with the normal rabbit serum (NRS) or normal goat serum (NGS) (6000X). N=Nucleus. Cy=Cytoplasm.

**A**

**siRNA RelB**

IDs11917

<https://www.thermofisher.com/order/genome-database/details/sirna/s11917?pluginName=&CID=&ICID=>

IDs11918

[https://www.thermofisher.com/order/genome-database/details/sirna/s11918?CID=&ICID=&subtype=sirna\\_silencer\\_select](https://www.thermofisher.com/order/genome-database/details/sirna/s11918?CID=&ICID=&subtype=sirna_silencer_select)

IDs11919

[https://www.thermofisher.com/order/genome-database/details/sirna/s11919?CID=&ICID=&subtype=sirna\\_silencer\\_select](https://www.thermofisher.com/order/genome-database/details/sirna/s11919?CID=&ICID=&subtype=sirna_silencer_select)

**siRNA BLNK**

IDs26556

<https://www.thermofisher.com/order/genome-database/details/sirna/s26556?CID=&ICID=&subtype=>

IDs26557

<https://www.thermofisher.com/order/genome-database/details/sirna/s26557?CID=&ICID=&subtype=>

IDs26558

<https://www.thermofisher.com/order/genome-database/details/sirna/s26558?CID=&ICID=&subtype=>

**B**

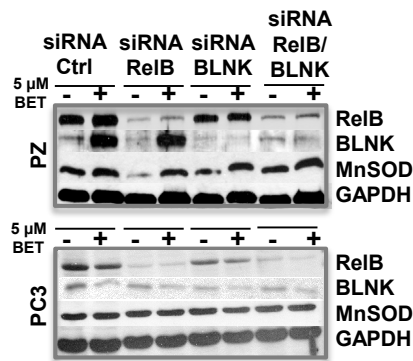

**C**

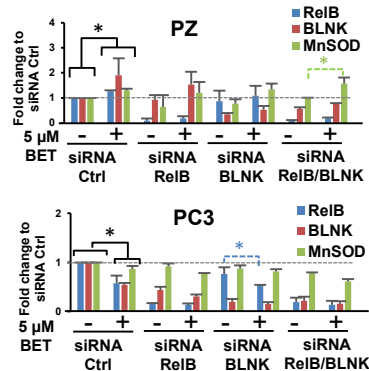

**D**

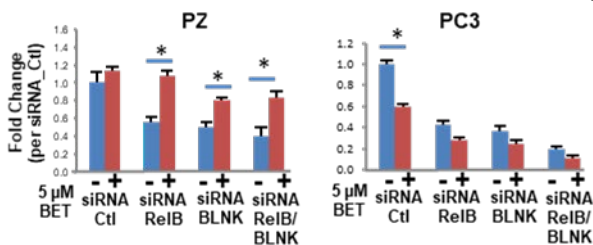

**E**

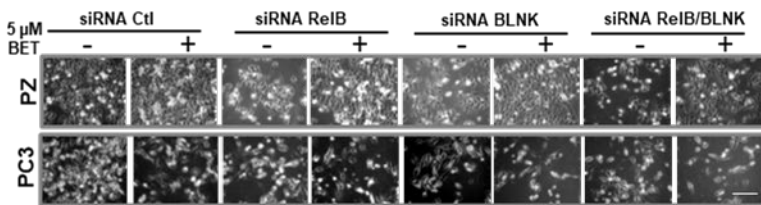

**Supplementary Figure S9. A decrease of RelB:BLNK axis with RelB knockdown and BLNK knockdown.** Cells were transfected with siRNA for 48 hours and then treated with BET for 24 hours. (A) siRNA(s) from Thermo Fisher. (B) Western blot analysis and (C) protein quantification of PC3 and PZ cells. N=3. (D) Trypan Blue assay and (E) represented photograph indicate a decrease in cell killing effect with siRNA against RelB, BLNK, or RelB+BLNK with or without BET treatment. \*p-value < 0.05 vs. non-BET. Scale bar = 50 μm.

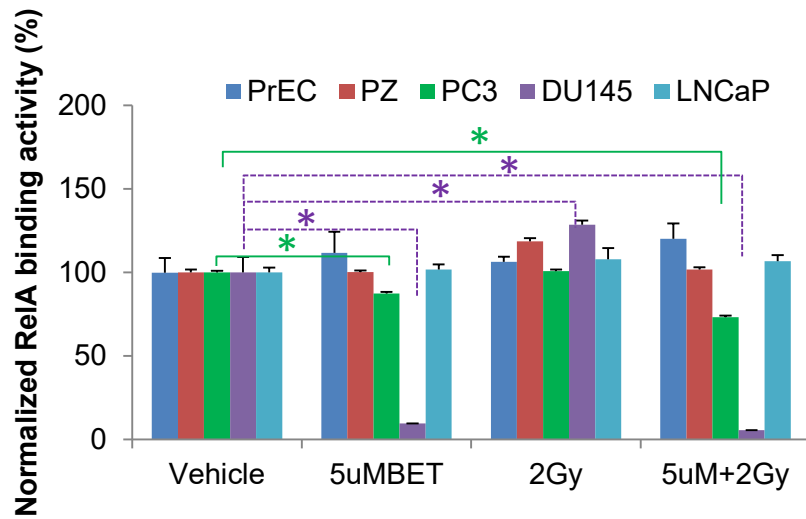

**Supplementary Figure S10.** RelA activity of normal cells and cancer cells after RT+ BET treatment (24 h) using Active Motif kit. \* p-value<0.05.

**Supplementary Table S1.** Average, high, and low SPRINT scores, for RELB, BLNK, and all predicted interactions

|        | AVERAGE | HIGH     | LOW  |
|--------|---------|----------|------|
| Q8WV28 | 45.93   | 3919.51  | 3.67 |
| Q01201 | 52.50   | 5207.63  | 3.67 |
| ALL    | 81.08   | 22465.60 | 3.67 |

**Supplementary Table S2.** SPRINT and STRING scores for BLNK and interacting partners from STRING

| STRING PPIs | Uniprot id | SPRINT  | Coexpression | Experimentally determined | Database annotated | Automated textmining | Combined score |
|-------------|------------|---------|--------------|---------------------------|--------------------|----------------------|----------------|
| BTK         | Q06187     | 17.1433 | 0.219        | 0.883                     | 0.9                | 0.99                 | 0.999          |
| CD79A       | P11912     | 0       | 0.23         | 0.675                     | 0.9                | 0.982                | 0.999          |
| CD79B       | P40259     | 13.5255 | 0.168        | 0                         | 0.9                | 0.798                | 0.981          |
| GRB2        | P62993     | 18.3088 | 0            | 0.872                     | 0.9                | 0.983                | 0.999          |
| LYN         | P07948     | 137.132 | 0.09         | 0.281                     | 0.9                | 0.786                | 0.984          |
| PLCG1       | P19174     | 166.236 | 0.065        | 0.47                      | 0.9                | 0.691                | 0.982          |
| PLCG2       | P16885     | 145.301 | 0.087        | 0.47                      | 0.9                | 0.988                | 0.999          |
| SH3KBP 1    | Q96B97     | 45.1201 | 0.062        | 0.68                      | 0.8                | 0.944                | 0.996          |
| SYK         | P43405     | 35.7875 | 0.18         | 0.867                     | 0.9                | 0.985                | 0.999          |
| VAV1        | P15498     | 38.7099 | 0.108        | 0.281                     | 0.8                | 0.952                | 0.993          |
|             | Average:   | 61.7264 |              |                           |                    |                      |                |

**Supplementary Table S3.** SPRINT and STRING scores for RELB and interacting partners from STRING

| STRING PPIs | Uniprot ID | SPRINT  | Coexpression | Experimentally determined | Database annotated | Automated textmining | Combined score |
|-------------|------------|---------|--------------|---------------------------|--------------------|----------------------|----------------|
| AHR         | P35869     | 82.9184 | 0            | 0                         | 0                  | 0.988                | 0.989          |
| CD40        | P25942     | 62.0186 | 0.092        | 0                         | 0                  | 0.987                | 0.988          |
| CHUK        | O15111     | 234.263 | 0.054        | 0.164                     | 0.9                | 0.983                | 0.998          |
| HDAC4       | P56524     | 241.772 | 0            | 0                         | 0                  | 0.955                | 0.955          |
| MAP3K14     | Q99558     | 105.674 | 0.072        | 0.07                      | 0.9                | 0.58                 | 0.958          |
| NFKB1       | P19838     | 0       | 0.247        | 0.985                     | 0.9                | 0.985                | 0.999          |
| NFKB2       | Q00653     | 0       | 0.795        | 0.977                     | 0.9                | 0.99                 | 0.999          |
| NFKBIA      | P25963     | 272.226 | 0.161        | 0.786                     | 0.54               | 0.972                | 0.997          |
| NFKBIE      | O00221     | 298.834 | 0.299        | 0.707                     | 0                  | 0.793                | 0.954          |
| RELA        | Q04206     | 269.459 | 0.121        | 0.871                     | 0.8                | 0.991                | 0.979          |
|             | Average:   | 156.717 |              |                           |                    |                      |                |

**Supplementary Table S4.** PPI Contacts between BLNK and RELB that appear 3 or more times out of ten models

| BLNK-RELB contact | # of times contact appears |               |               |               |               |
|-------------------|----------------------------|---------------|---------------|---------------|---------------|
| HIS431-VAL388     | 4                          | MOE model 1   | MOE model 2   | MOE model 4   | MOE model 5   |
| HIS431-ARG136     | 4                          | MOE model 1   | MOE model 2   | MOE model 4   | MOE model 5   |
| CYS343-TRP189     | 4                          | MOE model 3   | MOE model 4   | MOE model 5   | zdock model 2 |
| GLN430-GLU290     | 4                          | MOE model 1   | MOE model 4   | MOE model 5   | zdock model 1 |
| HIS431-ILE129     | 3                          | zdock model 1 | zdock model 2 | zdock model 4 |               |
| TYR451-HIS191     | 3                          | zdock model 1 | zdock model 3 | zdock model 4 |               |
| TYR451-GLU290     | 3                          | MOE model 4   | MOE model 5   | zdock model 3 |               |
| ALA452-HIS191     | 3                          | zdock model 1 | zdock model 3 | zdock model 4 |               |
| HIS431-VAL128     | 3                          | zdock model 1 | zdock model 2 | zdock model 4 |               |
| ARG448-ASP285     | 3                          | zdock model 1 | zdock model 4 | zdock model 5 |               |
| HIS431-VAL287     | 3                          | zdock model 1 | zdock model 2 | zdock model 4 |               |
| ALA452-TRP189     | 3                          | zdock model 1 | zdock model 3 | zdock model 4 |               |
| ARG427-GLU290     | 3                          | MOE model 1   | zdock model 1 | zdock model 4 |               |
| GLN430-ARG136     | 3                          | MOE model 1   | MOE model 4   | MOE model 5   |               |
| LYS450-ASP285     | 3                          | zdock model 1 | zdock model 2 | zdock model 4 |               |
| TYR451-TRP189     | 3                          | zdock model 1 | zdock model 3 | zdock model 4 |               |
| ARG427-GLU155     | 3                          | MOE model 2   | zdock model 1 | zdock model 4 |               |
| HIS431-CYS389     | 3                          | MOE model 1   | MOE model 4   | MOE model 5   |               |
| HIS431-LEU127     | 3                          | zdock model 1 | zdock model 2 | zdock model 4 |               |
| PRO345-ARG267     | 3                          | MOE model 4   | MOE model 5   | zdock model 4 |               |
| LYS344-LYS187     | 3                          | MOE model 4   | MOE model 5   | zdock model 4 |               |
| GLN430-GLN135     | 3                          | MOE model 1   | MOE model 4   | MOE model 5   |               |
| LYS450-GLU155     | 3                          | MOE model 1   | MOE model 4   | MOE model 5   |               |
| LYS450-HIS191     | 3                          | zdock model 1 | zdock model 3 | zdock model 4 |               |
| GLN430-GLU155     | 3                          | MOE model 1   | MOE model 4   | MOE model 5   |               |

**Supplementary Table S5.** Ranking from docking analysis using DB00443, known active/inactive compounds from PubChem and a background of approved drugs.

| PUBCHEM_CID | ACTIVITY_OUTCOME | RANK   |
|-------------|------------------|--------|
| 155511564   | Inactive         | 25.48% |
| 154659617   | Inactive         | 11.74% |
| 155552172   | Inactive         | 31.21% |
| 155553313   | Inactive         | 31.81% |
| 155556293   | Inactive         | 23.40% |
| 154659619   | Active           | 7.91%  |
| DB00443     | presumed active  | 20.10% |
